# Supplementary material
Source: PubMed Central journal article supplement (PMC8368519)
Supplement: 40670_2019_833_MOESM1_ESM.pdf [file 40670_2019_833_MOESM1_ESM.pdf]

**Table 1** Competency Milestones Assessed in Medical Students [19,21]

| <i>Milestone and Subcategories</i>                    | <i>Milestone Description</i>                                                              |
|-------------------------------------------------------|-------------------------------------------------------------------------------------------|
| <b>Patient Care (PC)</b>                              |                                                                                           |
| PC1a                                                  | History: Thoroughness and Organization                                                    |
| PC1b                                                  | Physical Exam: Thoroughness, Organization, and Accuracy                                   |
| PC2a                                                  | Clinical Reasoning: Thought process                                                       |
| PC2b                                                  | Clinical Reasoning: Differential Diagnosis                                                |
| PC2c                                                  | Clinical Reasoning: Diagnostic Work-up                                                    |
| PC7a                                                  | Clinical Judgment: Self-knowledge                                                         |
| PC7b                                                  | Clinical Judgment: Assessment and Plan                                                    |
| PC7c                                                  | Clinical Judgment: Entrustability                                                         |
| PC7e                                                  | (OG)RIME                                                                                  |
| <b>Interpersonal and Communication Skills (ICPS)</b>  |                                                                                           |
| IPCS7a                                                | Rapport and empathy with patients and families                                            |
| IPCS7b                                                | Flow, style and content of case presentations to supervisors, colleagues, or teams        |
| <b>Medical Knowledge (MK)</b>                         |                                                                                           |
| MK2a                                                  | Integration of scientific knowledge essential for one's chosen field of practice          |
| MK2b                                                  | Depth of scientific knowledge essential for one's chosen field of practice                |
| MK7a                                                  | Approach to learning to analyze, interpret, and prioritize new information                |
| MK7b                                                  | Inquiry of new information                                                                |
| MK7c                                                  | Use of information resources                                                              |
| <b>Practice-based Learning and Improvement (PBLI)</b> |                                                                                           |
| PBLI2                                                 | Continuous pursuit of learning                                                            |
| PBLI3a                                                | Receptivity to feedback                                                                   |
| PBLI3b                                                | Initiative in seeking feedback                                                            |
| PBLI3c                                                | Self-assessment: Use of data to identify learning needs and implement learning strategies |
| <b>Systems-based Practice (SBP)</b>                   |                                                                                           |
| SBP2a                                                 | Initiative and contribution to address needs of the team                                  |
| SBP2b                                                 | Prioritization of patient care activities                                                 |
| SBP2c                                                 | Influence on group dynamics                                                               |
| SBP2d                                                 | Conflict management                                                                       |
| <b>Professionalism (PR)</b>                           |                                                                                           |
| PR1a                                                  | Professional demeanor                                                                     |
| PR1b                                                  | Professional duty                                                                         |
| PR5a                                                  | Honesty                                                                                   |
| PR5b                                                  | Transparency                                                                              |
| PR8a                                                  | Respect for all regardless of differences in values, beliefs, and experiences             |
| PR8b                                                  | Sensitivity to others                                                                     |
